# Supplementary material for: Carotenoid accumulation in orange-pigmented Capsicum annuum fruit, regulated at multiple levels
Source: PubMed Central journal article supplement — J Exp Bot. 2011 Sep 26;63(1):517–26. doi: 10.1093/jxb/err302 (PMC3245482; doi:10.1093/jxb/err302), 2011-09-26
Supplement: supp_err302_00068601_file001.pdf [file supp_err302_00068601_file001.pdf]

## **Carotenoid Accumulation in Orange Pigmented *Capsicum annuum* Fruit, Regulated at Multiple Levels**

*Laura Rodriguez-Uribe, Ivette Guzman, Wathsala Rajapakse, Richard D. Richins, and  
Mary A. O'Connell*

Figure S1. Alignment of *Ccs* promoter region (~860 bp 5' to ATG start codon) cloned and sequenced from genomic DNA of NuMex Sunset, Oriole, Canary, Calencia, Orange Grande and Fogo. Multiple independent clones for the *Ccs* promoter from each cultivar were obtained. Alternate forms of the sequence at three positions are indicated with the symbols Y (C or T) or R (A or G). The reference sequence from GenBank Y14165 is included as well.

Figure S1. Alignment of Ccs promoter region.

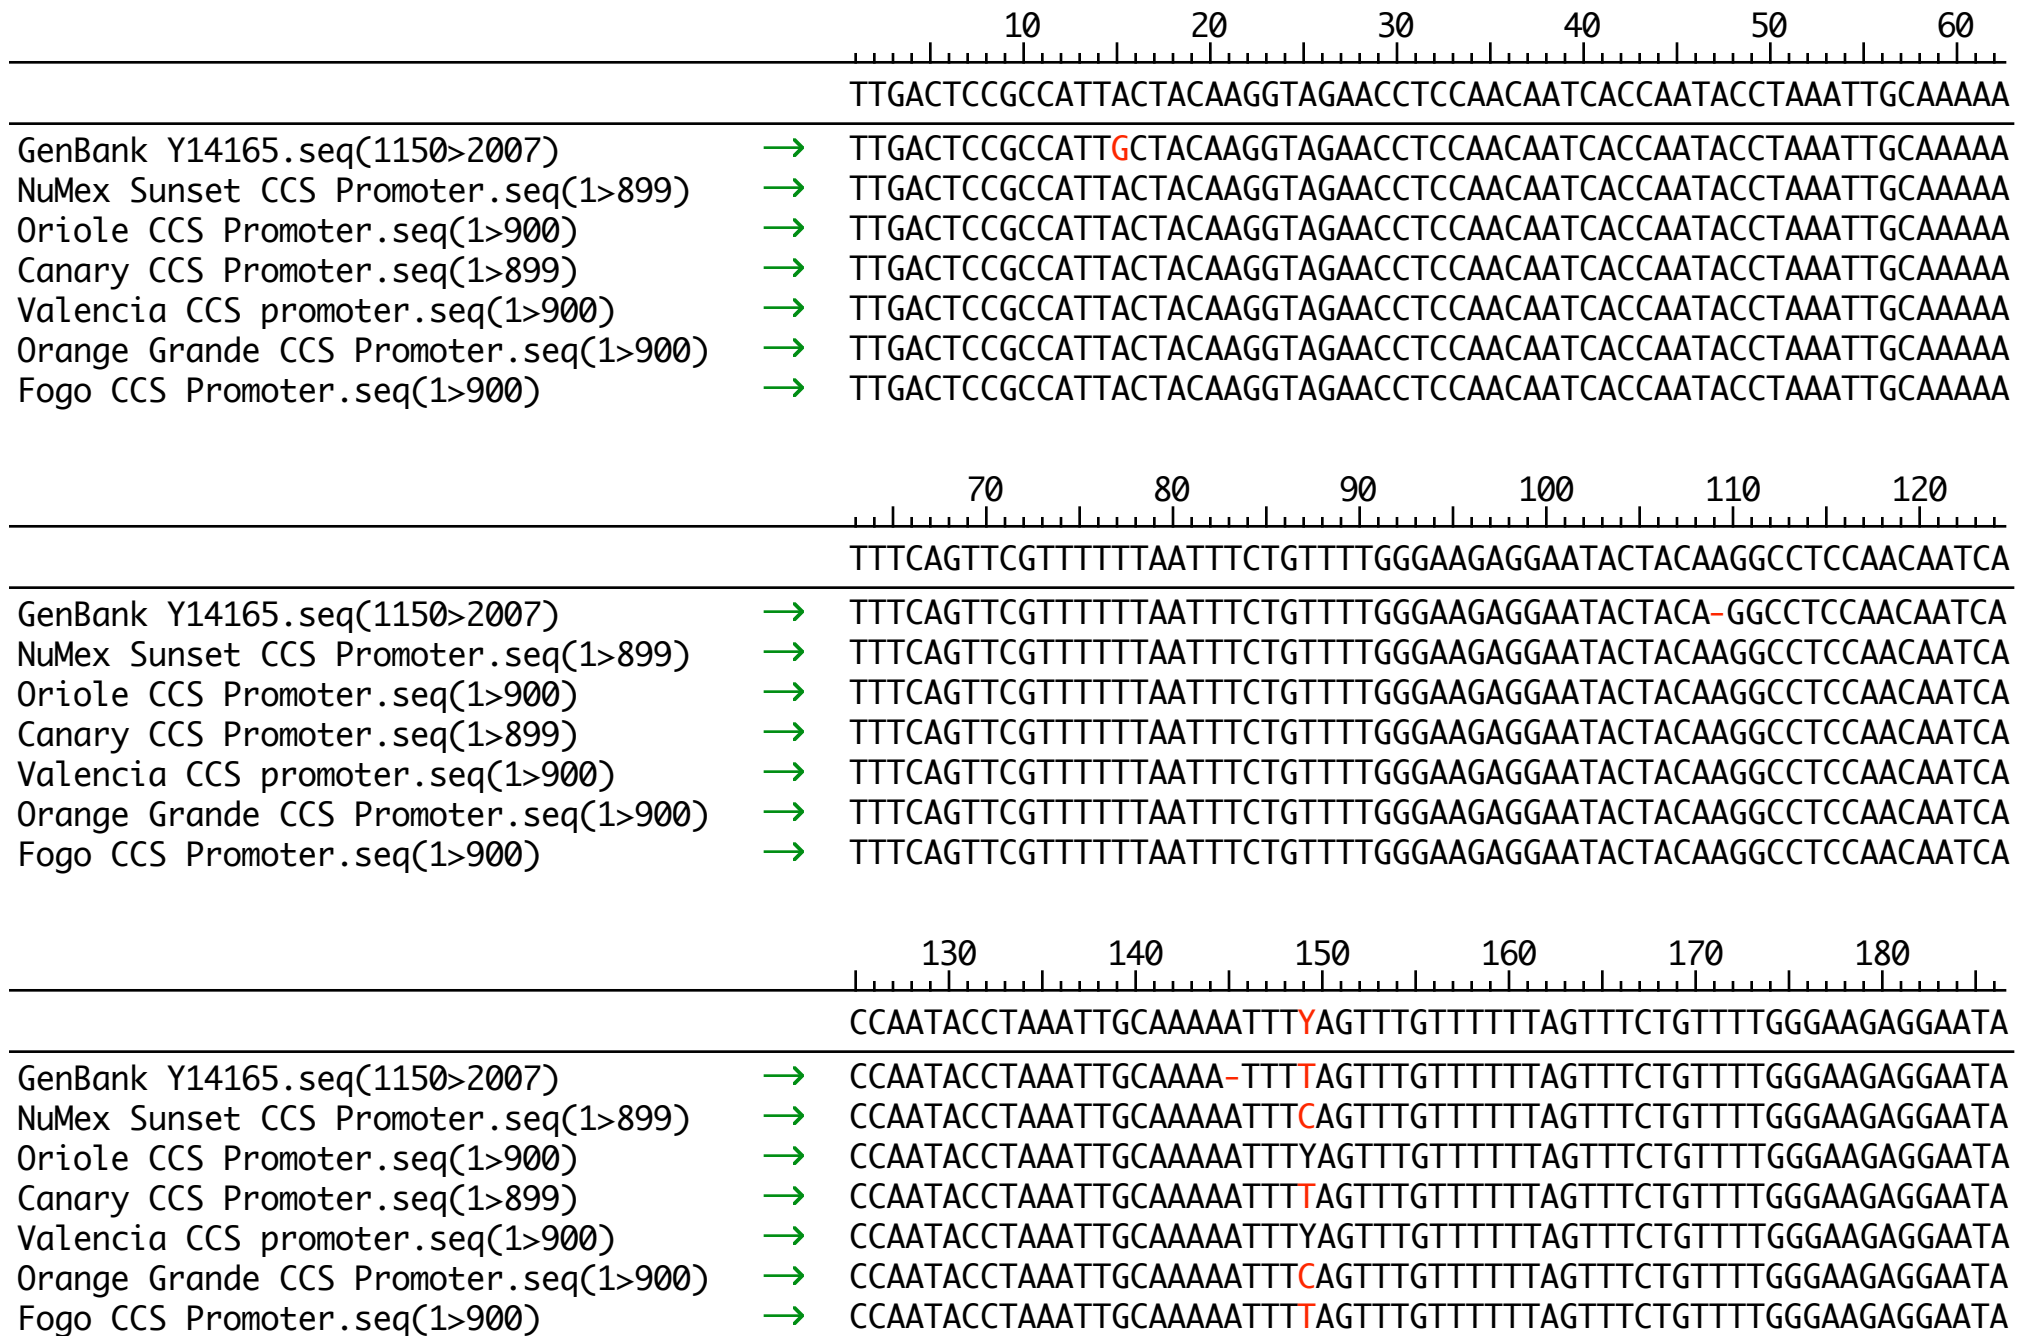

|                                       |   | 190                                                             | 200 | 210 | 220 | 230 | 240 |     |
|---------------------------------------|---|-----------------------------------------------------------------|-----|-----|-----|-----|-----|-----|
|                                       |   | CTACAAGGTAAGGCCTCCAACAATCACCAATACCTAAATTGCAAAAATTTTCAGTTCGTATTT |     |     |     |     |     |     |
| GenBank Y14165.seq(1150>2007)         | → | CTACAAGGTAAGGCCTCCAACAATCACCAATACCTAAATTGCAAAAATTTTCAGTTCGTATTT |     |     |     |     |     |     |
| NuMex Sunset CCS Promoter.seq(1>899)  | → | CTACAAGGTAAGGCCTCCAACAATCACCAATACCTAAATTGCAAAAATTTTCAGTTCGTATTT |     |     |     |     |     |     |
| Oriole CCS Promoter.seq(1>900)        | → | CTACAAGGTAAGGCCTCCAACAATCACCAATACCTAAATTGCAAAAATTTTCAGTTCGTATTT |     |     |     |     |     |     |
| Canary CCS Promoter.seq(1>899)        | → | CTACAAGGTAAGGCCTCCAACAATCACCAATACCTAAATTGCAAAAATTTTCAGTTCGTATTT |     |     |     |     |     |     |
| Valencia CCS promoter.seq(1>900)      | → | CTACAAGGTAAGGCCTCCAACAATCACCAATACCTAAATTGCAAAAATTTTCAGTTCGTATTT |     |     |     |     |     |     |
| Orange Grande CCS Promoter.seq(1>900) | → | CTACAAGGTAAGGCCTCCAACAATCACCAATACCTAAATTGCAAAAATTTTCAGTTCGTATTT |     |     |     |     |     |     |
| Fogo CCS Promoter.seq(1>900)          | → | CTACAAGGTAAGGCCTCCAACAATCACCAATACCTAAATTGCAAAAATTTTCAGTTCGTATTT |     |     |     |     |     |     |
|                                       |   | 250                                                             | 260 | 270 | 280 | 290 | 300 | 310 |
|                                       |   | TCGTTTCTATTTTGGGAAGTGAATAGTATAAGGTAGGACCTCCAACAATCACCAATACCTA   |     |     |     |     |     |     |
| GenBank Y14165.seq(1150>2007)         | → | TCGTTTCTATTTTGGGAAGTGAATAGTATAAGGTAGGACCTCCAACAATCACCAATACCTA   |     |     |     |     |     |     |
| NuMex Sunset CCS Promoter.seq(1>899)  | → | TCGTTTCTATTTTGGGAAGTGAATAGTATAAGGTAGGACCTCCAACAATCACCAATACCTA   |     |     |     |     |     |     |
| Oriole CCS Promoter.seq(1>900)        | → | TCGTTTCTATTTTGGGAAGTGAATAGTATAAGGTAGGACCTCCAACAATCACCAATACCTA   |     |     |     |     |     |     |
| Canary CCS Promoter.seq(1>899)        | → | TCGTTTCTATTTTGGGAAGTGAATAGTATAAGGTAGGACCTCCAACAATCACCAATACCTA   |     |     |     |     |     |     |
| Valencia CCS promoter.seq(1>900)      | → | TCGTTTCTATTTTGGGAAGTGAATAGTATAAGGTAGGACCTCCAACAATCACCAATACCTA   |     |     |     |     |     |     |
| Orange Grande CCS Promoter.seq(1>900) | → | TCGTTTCTATTTTGGGAAGTGAATAGTATAAGGTAGGACCTCCAACAATCACCAATACCTA   |     |     |     |     |     |     |
| Fogo CCS Promoter.seq(1>900)          | → | TCGTTTCTATTTTGGGAAGTGAATAGTATAAGGTAGGACCTCCAACAATCACCAATACCTA   |     |     |     |     |     |     |
|                                       |   | 320                                                             | 330 | 340 | 350 | 360 | 370 |     |
|                                       |   | AATTGCAAAGTTCCGATTCATTTTTTAGTTTCTGTTTTGGAAAGAGAAATACTACAAGGTA   |     |     |     |     |     |     |
| GenBank Y14165.seq(1150>2007)         | → | AATTGCAAAGTTCCGATTCATTTTTTAGTTTCTGTTTTGGAAAGAGAAATACTACAAGGTA   |     |     |     |     |     |     |
| NuMex Sunset CCS Promoter.seq(1>899)  | → | AATTGCAAAGTTCCGATTCATTTTTTAGTTTCTGTTTTGGAAAGAGAAATACTACAAGGTA   |     |     |     |     |     |     |
| Oriole CCS Promoter.seq(1>900)        | → | AATTGCAAAGTTCCGATTCATTTTTTAGTTTCTGTTTTGGAAAGAGAAATACTACAAGGTA   |     |     |     |     |     |     |
| Canary CCS Promoter.seq(1>899)        | → | AATTGCAAAGTTCCGATTCATTTTTTAGTTTCTGTTTTGGAAAGAGAAATACTACAAGGTA   |     |     |     |     |     |     |
| Valencia CCS promoter.seq(1>900)      | → | AATTGCAAAGTTCCGATTCATTTTTTAGTTTCTGTTTTGGAAAGAGAAATACTACAAGGTA   |     |     |     |     |     |     |
| Orange Grande CCS Promoter.seq(1>900) | → | AATTGCAAAGTTCCGATTCATTTTTTAGTTTCTGTTTTGGAAAGAGAAATACTACAAGGTA   |     |     |     |     |     |     |
| Fogo CCS Promoter.seq(1>900)          | → | AATTGCAAAGTTCCGATTCATTTTTTAGTTTCTGTTTTGGAAAGAGAAATACTACAAGGTA   |     |     |     |     |     |     |

|                                       |   |                                                                 |     |     |     |     |     |  |  |
|---------------------------------------|---|-----------------------------------------------------------------|-----|-----|-----|-----|-----|--|--|
|                                       |   | 380                                                             | 390 | 400 | 410 | 420 | 430 |  |  |
|                                       |   | GGGYCTCCAACAATCACCAGTACCTAAATTGTAAAAATTTTCAGTTCGTTTTTTAGTTTCTAT |     |     |     |     |     |  |  |
| GenBank Y14165.seq(1150>2007)         | → | GGGCTCCAACAATCACCAGTACCTAAATTGTAAAAATTTTCAGTTCGTTTTTTAGTTTCTAT  |     |     |     |     |     |  |  |
| NuMex Sunset CCS Promoter.seq(1>899)  | → | GGGTCTCCAACAATCACCAGTACCTAAATTGTAAAAATTTTCAGTTCGTTTTTTAGTTTCTAT |     |     |     |     |     |  |  |
| Oriole CCS Promoter.seq(1>900)        | → | GGGYCTCCAACAATCACCAGTACCTAAATTGTAAAAATTTTCAGTTCGTTTTTTAGTTTCTAT |     |     |     |     |     |  |  |
| Canary CCS Promoter.seq(1>899)        | → | GGGCTCCAACAATCACCAGTACCTAAATTGTAAAAATTTTCAGTTCGTTTTTTAGTTTCTAT  |     |     |     |     |     |  |  |
| Valencia CCS promoter.seq(1>900)      | → | GGGYCTCCAACAATCACCAGTACCTAAATTGTAAAAATTTTCAGTTCGTTTTTTAGTTTCTAT |     |     |     |     |     |  |  |
| Orange Grande CCS Promoter.seq(1>900) | → | GGGYCTCCAACAATCACCAGTACCTAAATTGTAAAAATTTTCAGTTCGTTTTTTAGTTTCTAT |     |     |     |     |     |  |  |
| Fogo CCS Promoter.seq(1>900)          | → | GGGCTCCAACAATCACCAGTACCTAAATTGTAAAAATTTTCAGTTCGTTTTTTAGTTTCTAT  |     |     |     |     |     |  |  |
|                                       |   | 440                                                             | 450 | 460 | 470 | 480 | 490 |  |  |
|                                       |   | TTTGGGAAGTGAATAGTATAAGGTAGGACCTCCAACAATCACCAATACCTAAATTGCAAAA   |     |     |     |     |     |  |  |
| GenBank Y14165.seq(1150>2007)         | → | TTTGGGAAGTGAATAGTATAAGGTAGGACCTCCAACAATCACCAATACCTAAATTGCAAAA   |     |     |     |     |     |  |  |
| NuMex Sunset CCS Promoter.seq(1>899)  | → | TTTGGGAAGTGAATAGTATAAGGTAGGACCTCCAACAATCACCAATACCTAAATTGCAAAA   |     |     |     |     |     |  |  |
| Oriole CCS Promoter.seq(1>900)        | → | TTTGGGAAGTGAATAGTATAAGGTAGGACCTCCAACAATCACCAATACCTAAATTGCAAAA   |     |     |     |     |     |  |  |
| Canary CCS Promoter.seq(1>899)        | → | TTTGGGAAGTGAATAGTATAAGGTAGGACCTCCAACAATCACCAATACCTAAATTGCAAAA   |     |     |     |     |     |  |  |
| Valencia CCS promoter.seq(1>900)      | → | TTTGGGAAGTGAATAGTATAAGGTAGGACCTCCAACAATCACCAATACCTAAATTGCAAAA   |     |     |     |     |     |  |  |
| Orange Grande CCS Promoter.seq(1>900) | → | TTTGGGAAGTGAATAGTATAAGGTAGGACCTCCAACAATCACCAATACCTAAATTGCAAAA   |     |     |     |     |     |  |  |
| Fogo CCS Promoter.seq(1>900)          | → | TTTGGGAAGTGAATAGTATAAGGTAGGACCTCCAACAATCACCAATACCTAAATTGCAAAA   |     |     |     |     |     |  |  |
|                                       |   | 500                                                             | 510 | 520 | 530 | 540 | 550 |  |  |
|                                       |   | GTTCCGATTCTTTTTTTAGTTTCTGTTTTGGAAAGAGAAATACTACAAGRTAGGACCTTCAA  |     |     |     |     |     |  |  |
| GenBank Y14165.seq(1150>2007)         | → | GTTCCGATTCTTTTTTTAGTTTCTGTTTTGGAAAGAGAAATACTACAAGATAGGACCTTCAA  |     |     |     |     |     |  |  |
| NuMex Sunset CCS Promoter.seq(1>899)  | → | GTTCCGATTCTTTTTTTAGTTTCTGTTTTGGAAAGAGAAATACTACAAGGTAGGACCTTCAA  |     |     |     |     |     |  |  |
| Oriole CCS Promoter.seq(1>900)        | → | GTTCCGATTCTTTTTTTAGTTTCTGTTTTGGAAAGAGAAATACTACAAGRTAGGACCTTCAA  |     |     |     |     |     |  |  |
| Canary CCS Promoter.seq(1>899)        | → | GTTCCGATTCTTTTTTTAGTTTCTGTTTTGGAAAGAGAAATACTACAAGATAGGACCTTCAA  |     |     |     |     |     |  |  |
| Valencia CCS promoter.seq(1>900)      | → | GTTCCGATTCTTTTTTTAGTTTCTGTTTTGGAAAGAGAAATACTACAAGRTAGGACCTTCAA  |     |     |     |     |     |  |  |
| Orange Grande CCS Promoter.seq(1>900) | → | GTTCCGATTCTTTTTTTAGTTTCTGTTTTGGAAAGAGAAATACTACAAGRTAGGACCTTCAA  |     |     |     |     |     |  |  |
| Fogo CCS Promoter.seq(1>900)          | → | GTTCCGATTCTTTTTTTAGTTTCTGTTTTGGAAAGAGAAATACTACAAGATAGGACCTTCAA  |     |     |     |     |     |  |  |

|                                       |   | 560                                                              | 570 | 580 | 590 | 600 | 610 | 620 |
|---------------------------------------|---|------------------------------------------------------------------|-----|-----|-----|-----|-----|-----|
|                                       |   | CAATCACCAATACCTAAATTGCAAAAACCTTCAGTTCATTTTTTAGTTTCTGTTTTGGGAAGA  |     |     |     |     |     |     |
| GenBank Y14165.seq(1150>2007)         | → | CAATCACCAATACCTAAATTGCAAAAACCTTCAGTTCATTTTTTAGTTTCTGTTTTGGGAAGA  |     |     |     |     |     |     |
| NuMex Sunset CCS Promoter.seq(1>899)  | → | CAATCACCAATACCTAAATTGCAAAAACCTTCAGTTCATTTTTTAGTTTCTGTTTTGGGAAGA  |     |     |     |     |     |     |
| Oriole CCS Promoter.seq(1>900)        | → | CAATCACCAATACCTAAATTGCAAAAACCTTCAGTTCATTTTTTAGTTTCTGTTTTGGGAAGA  |     |     |     |     |     |     |
| Canary CCS Promoter.seq(1>899)        | → | CAATCACCAATACCTAAATTGCAAAAACCTTCAGTTCATTTTTTAGTTTCTGTTTTGGGAAGA  |     |     |     |     |     |     |
| Valencia CCS promoter.seq(1>900)      | → | CAATCACCAATACCTAAATTGCAAAAACCTTCAGTTCATTTTTTAGTTTCTGTTTTGGGAAGA  |     |     |     |     |     |     |
| Orange Grande CCS Promoter.seq(1>900) | → | CAATCACCAATACCTAAATTGCAAAAACCTTCAGTTCATTTTTTAGTTTCTGTTTTGGGAAGA  |     |     |     |     |     |     |
| Fogo CCS Promoter.seq(1>900)          | → | CAATCACCAATACCTAAATTGCAAAAACCTTCAGTTCATTTTTTAGTTTCTGTTTTGGGAAGA  |     |     |     |     |     |     |
|                                       |   | 630                                                              | 640 | 650 | 660 | 670 | 680 |     |
|                                       |   | AGAATACTTCAAGGTAACAATCACCAATACCTAAATTA AAAATTTTCAGTTAGTTTTTTAGTT |     |     |     |     |     |     |
| GenBank Y14165.seq(1150>2007)         | → | AGAATACTTCAAGGTAACAATCACCAATACCTAAATTA AAAATTTTCAGTTAGTTTTTTAGTT |     |     |     |     |     |     |
| NuMex Sunset CCS Promoter.seq(1>899)  | → | AGAATACTTCAAGGTAACAATCACCAATACCTAAATTA AAAATTTTCAGTTAGTTTTTTAGTT |     |     |     |     |     |     |
| Oriole CCS Promoter.seq(1>900)        | → | AGAATACTTCAAGGTAACAATCACCAATACCTAAATTA AAAATTTTCAGTTAGTTTTTTAGTT |     |     |     |     |     |     |
| Canary CCS Promoter.seq(1>899)        | → | AGAATACTTCAAGGTAACAATCACCAATACCTAAATTA AAAATTTTCAGTTAGTTTTTTAGTT |     |     |     |     |     |     |
| Valencia CCS promoter.seq(1>900)      | → | AGAATACTTCAAGGTAACAATCACCAATACCTAAATTA AAAATTTTCAGTTAGTTTTTTAGTT |     |     |     |     |     |     |
| Orange Grande CCS Promoter.seq(1>900) | → | AGAATACTTCAAGGTAACAATCACCAATACCTAAATTA AAAATTTTCAGTTAGTTTTTTAGTT |     |     |     |     |     |     |
| Fogo CCS Promoter.seq(1>900)          | → | AGAATACTTCAAGGTAACAATCACCAATACCTAAATTA AAAATTTTCAGTTAGTTTTTTAGTT |     |     |     |     |     |     |
|                                       |   | 690                                                              | 700 | 710 | 720 | 730 | 740 |     |
|                                       |   | TCTGTTTTTGGGAAGAGGAATACTTTCTTTTGCTATATAAAGCCAAAGTAGGTACCTATAAG   |     |     |     |     |     |     |
| GenBank Y14165.seq(1150>2007)         | → | TCTGTTTTTGGGAAGAGGAATACTTTCTTTTGCTATATAAAGCCAAAGTAGGTACCTATAAG   |     |     |     |     |     |     |
| NuMex Sunset CCS Promoter.seq(1>899)  | → | TCTGTTTTTGGGAAGAGGAATACTTTCTTTTGCTATATAAAGCCAAAGTAGGTACCTATAAG   |     |     |     |     |     |     |
| Oriole CCS Promoter.seq(1>900)        | → | TCTGTTTTTGGGAAGAGGAATACTTTCTTTTGCTATATAAAGCCAAAGTAGGTACCTATAAG   |     |     |     |     |     |     |
| Canary CCS Promoter.seq(1>899)        | → | TCTGTTTTTGGGAAGAGGAATACTTTCTTTTGCTATATAAAGCCAAAGTAGGTACCTATAAG   |     |     |     |     |     |     |
| Valencia CCS promoter.seq(1>900)      | → | TCTGTTTTTGGGAAGAGGAATACTTTCTTTTGCTATATAAAGCCAAAGTAGGTACCTATAAG   |     |     |     |     |     |     |
| Orange Grande CCS Promoter.seq(1>900) | → | TCTGTTTTTGGGAAGAGGAATACTTTCTTTTGCTATATAAAGCCAAAGTAGGTACCTATAAG   |     |     |     |     |     |     |
| Fogo CCS Promoter.seq(1>900)          | → | TCTGTTTTTGGGAAGAGGAATACTTTCTTTTGCTATATAAAGCCAAAGTAGGTACCTATAAG   |     |     |     |     |     |     |

750            760            770            780            790            800

---

CATCAATATTTTGTATTGCTTAGTGATTCCCCTAGTTCGGTATTTTCATTTTTTTTCACTATA

---

GenBank Y14165.seq(1150>2007)      → CATCAATATTTTGTATTGCTTAGTGATTCCCCTAGTTCGGTATTTTCATTTTTTTTCACTATA  
 NuMex Sunset CCS Promoter.seq(1>899)      → CATCAATATTTTGTATTGCTTAGTGATTCCCCTAGTTCGGTATTTTCATTTTTTTTCACTATA  
 Oriole CCS Promoter.seq(1>900)      → CATCAATATTTTGTATTGCTTAGTGATTCCCCTAGTTCGGTATTTTCATTTTTTTTCACTATA  
 Canary CCS Promoter.seq(1>899)      → CATCAATATTTTGTATTGCTTAGTGATTCCCCTAGTTCGGTATTTTCATTTTTTTTCACTATA  
 Valencia CCS promoter.seq(1>900)      → CATCAATATTTTGTATTGCTTAGTGATTCCCCTAGTTCGGTATTTTCATTTTTTTTCACTATA  
 Orange Grande CCS Promoter.seq(1>900)      → CATCAATATTTTGTATTGCTTAGTGATTCCCCTAGTTCGGTATTTTCATTTTTTTTCACTATA  
 Fogo CCS Promoter.seq(1>900)      → CATCAATATTTTGTATTGCTTAGTGATTCCCCTAGTTCGGTATTTTCATTTTTTTTCACTATA

810            820            830            840            850            860

---

CTATATCACCTCCTCTCATAAATAGCCATTATAAATCTTGCATTTTCTCTAATGGAAACCCT

---

GenBank Y14165.seq(1150>2007)      → CTATATCACCTCCTCTCATAAATAGCCATTATAAATCTTGCATTTTCTCTAATG  
 NuMex Sunset CCS Promoter.seq(1>899)      → CTATATCACCTCCTCTCATAAATAGCCATTATAAATCTTGCATTTTCTCTAATGGAAACCCT  
 Oriole CCS Promoter.seq(1>900)      → CTATATCACCTCCTCTCATAAATAGCCATTATAAATCTTGCATTTTCTCTAATGGAAACCCT  
 Canary CCS Promoter.seq(1>899)      → CTATATCACCTCCTCTCATAAATAGCCATTATAAATCTTGCATTTTCTCTAATGGAAACCCT  
 Valencia CCS promoter.seq(1>900)      → CTATATCACCTCCTCTCATAAATAGCCATTATAAATCTTGCATTTTCTCTAATGGAAACCCT  
 Orange Grande CCS Promoter.seq(1>900)      → CTATATCACCTCCTCTCATAAATAGCCATTATAAATCTTGCATTTTCTCTAATGGAAACCCT  
 Fogo CCS Promoter.seq(1>900)      → CTATATCACCTCCTCTCATAAATAGCCATTATAAATCTTGCATTTTCTCTAATGGAAACCCT

870            880            890            900

---

TCTAAAGCCTTTTCCATCTCCTTTACTTTCCA

---

NuMex Sunset CCS Promoter.seq(1>899)      → TCTAAAGCCTTTTCCATCTCCTTTACTTTCC  
 Oriole CCS Promoter.seq(1>900)      → TCTAAAGCCTTTTCCATCTCCTTTACTTTCCA  
 Canary CCS Promoter.seq(1>899)      → TCTAAAGCCTTTTCCATCTCCTTTACTTTCC  
 Valencia CCS promoter.seq(1>900)      → TCTAAAGCCTTTTCCATCTCCTTTACTTTCCA  
 Orange Grande CCS Promoter.seq(1>900)      → TCTAAAGCCTTTTCCATCTCCTTTACTTTCCA  
 Fogo CCS Promoter.seq(1>900)      → TCTAAAGCCTTTTCCATCTCCTTTACTTTCCA
